# Supplementary material
Source: publisher site journal article supplement (https://www.dovepress.com/get_supplementary_file.php?f=306125.docx)

**Supplemental Table 1. The ICD-10 codes information of diagnosis.**

| Diagnosis | ICD-10 codes |
| --- | --- |
| Coronary Artery disease | CD-10; I20.xx–I25.xx, I50.00001 and I91.40001 |
| acute myocardial infarction | I21.xx |
| Hypertension | I10.x00, I10.x05, I10.x04, I10.x03, I11.900, I10. 13, I12.900, H35.004, I12.903, I15.900, I67.400, I13.900, I15.800, I11.000, I12.000, I10.x06, I10.x01, I13.100, I10.x04, I10. 03, I10.x05, I10.x03, R03.000, I11.901, I10.x09, I10.x07, I10.x00, I15.102, I12.900, I11.900, I11.002, I12.000, I10.x11, I13.900, I15.103, I15.200, I11.000, I11.001, I10.x12, I10.x10, I13.000, |
| Diabete mellitus | E11.900, E14.900, E11.901, E11.300, E11.301+H36.0, E11.401+G63.2, E11.501+I79.2, E11.601, E11.700, E11.200+N08.3, E10.900, E13.905, E11.800, E13.903, E11.400, E11.200+N08.3, E13.300+H36.0, E13.200+N08.3, E11.100, E13.907, E11.10001, E11.60001, E14.10001, E11.500, E10.401+G63.2, E11.403+G63.2, E13.400+G63.2, E13.500, E13.700, Z83.300, E11.502, E11.60002, E10.201, E11.901, N08.301, E11.900, E11.700, E11.200, E11.90002, E11.201+N08.3, E14.900, E13.900, E14.300, E14.800, E13.200, E11.800, O24.300, E14.200, O24.100, E13.800, E11.503, E11.400, E13.600, E14.600, E11.302+H28.0, E14.500, E14.400, E11.500, E11.101, E13.201+N08.3, E11.70001, E14.700, E11.502+I79.2, E13.400, E11.100, E11.103, E11.300, E13.300, E10.400, E13.500, E11.505, E12.000, E11.600, E13.700, E11.604, E11.402+G99.0, R73.003 |

**Supplemental Table 2 Cox proportional hazard ratios for 30-day all-cause mortality in different models.**

|  |  |  | 30-day all-cause mortality | | |
| --- | --- | --- | --- | --- | --- |
|  | n | events, n (%) | HR, 95%Cl, p-value | | |
|  |  |  | Model 1* | Model 2$ | Model 3§ |
| non-hypochloremia | 46863 | 464 (1%) | ref | ref | ref |
| hypochloremia | 2162 | 74(3.4%) | 3.50 (2.74-4.47), <0.001 | 3.04(2.37-3.88), <0.001 | 1.86(1.06-3.27), 0.03 |

*Unadjusted

$ Adjusted for age and gender;

§Adjusted for full multivariate: age, gender, hypertension, acute myocardial infarction, pre-acute myocardial infarction, diabetes mellitus, percutaneous coronary intervention, anemia, chronic kidney disease, congestive heart failure, angiotensin-converting enzyme inhibitor/angiotensin receptor blockers, β-blockers, calcium channel blockers, antiplatelet agent;

**Supplemental Figure 1. Kaplan–Meier curves for 30-day all-cause mortality of hypochloremia.**


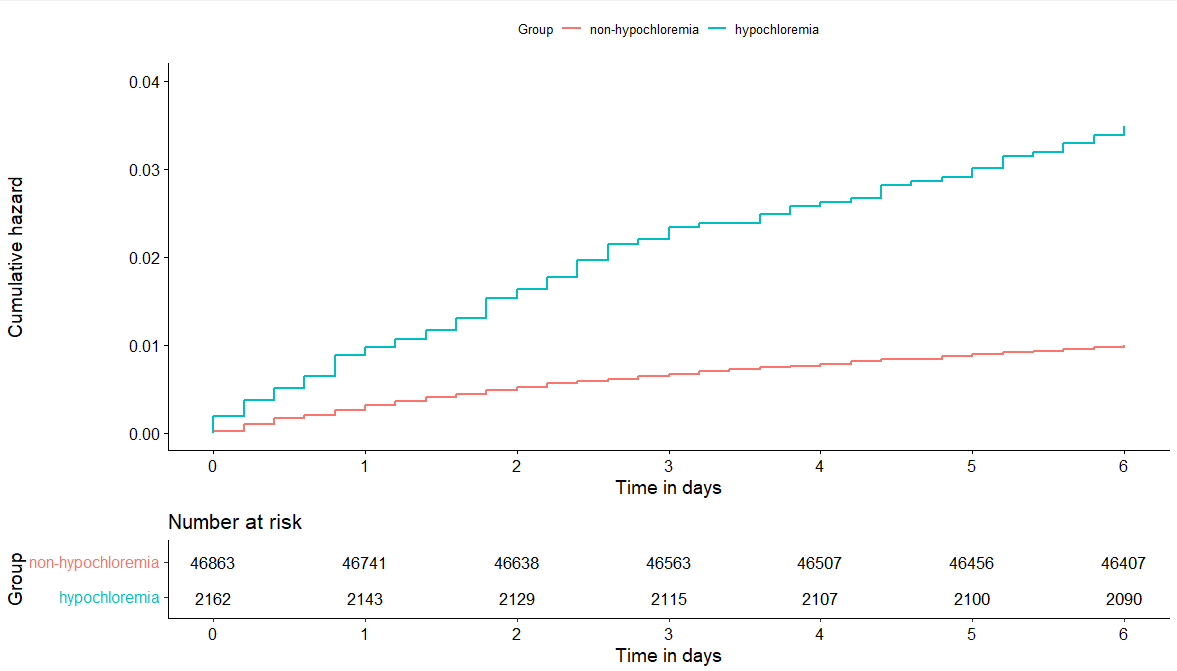

Supplement: Supplementary file 1 [file get_supplementary_file.php]
